# Supplementary material for: Evaluation of apoptosis imaging biomarkers in a genetic model of cell death
Source: PubMed Central journal article supplement (PMC6381199; doi:10.1186/s13550-019-0487-8), 2019-02-19

Figure S1

A

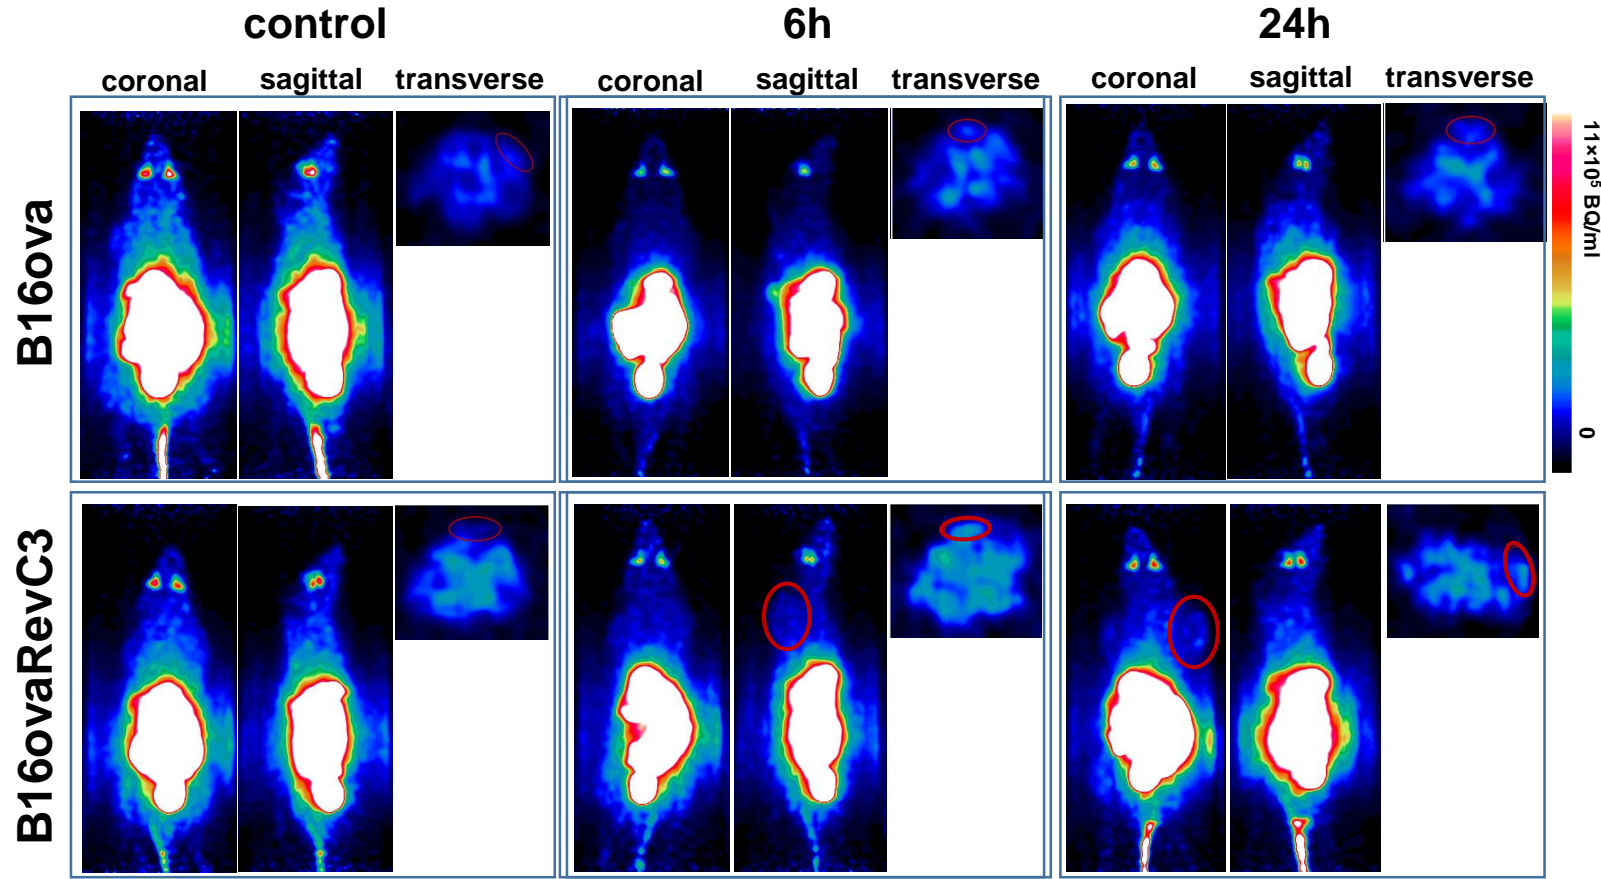

B

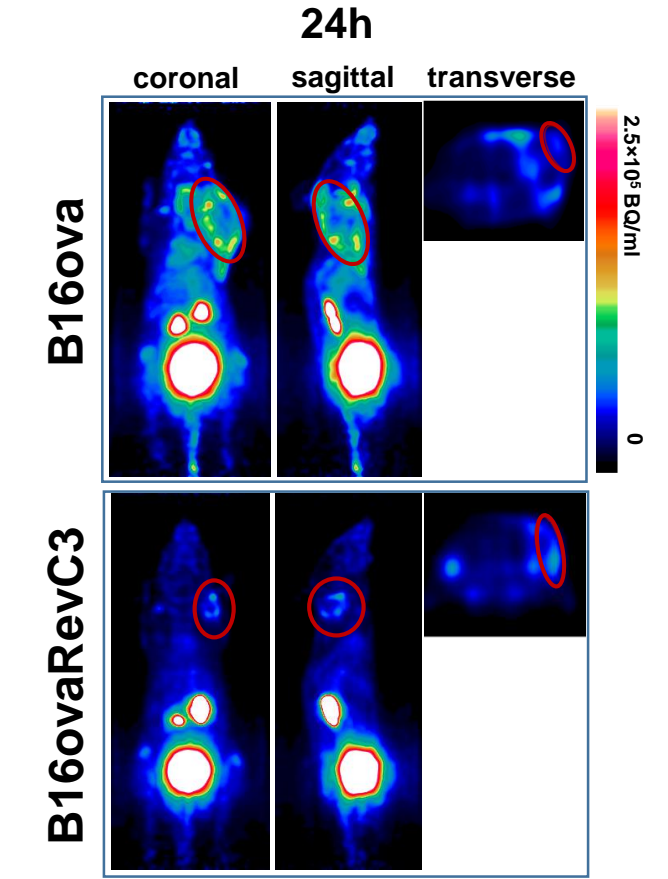

Supplement: 13550_2019_487_MOESM1_ESM.pdf [file 13550_2019_487_MOESM1_ESM.pdf]
